## CORRECTION

# Avian thermoregulation in the heat: evaporative cooling capacity in an archetypal desert specialist, Burchell's sandgrouse (*Pterocles burchelli*)

Andrew E. McKechnie, Ben Smit, Maxine C. Whitfield, Matthew J. Noakes, William A. Talbot, Mateo Garcia, Alexander R. Gerson and Blair O. Wolf

There was an error published in *J. Exp. Biol.* **219**, pp. 2137-2144.

The scaling of the y-axes in the insets of Figs 2 and 3 is incorrect. The corrected figures are printed below.

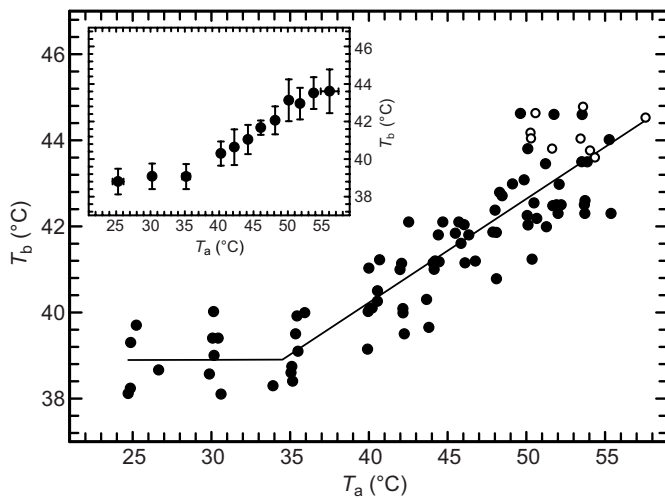

**Fig. 2.** Body temperature ( $T_b$ ) of Burchell's sandgrouse (*Pterocles burchelli*) as a function of air temperature ( $T_a$ ). Data for individuals that reached their thermal endpoint are shown as open circles. The solid line is the segmented linear regression model that provided the best fit; the relationship between  $T_b$  and  $T_a > 34.5^\circ\text{C}$  is  $T_b = 0.241T_a + 30.58$  ( $r^2$  for segmented regression model = 0.818). Inset shows mean  $\pm$  s.d.  $T_b$  for  $T_a$  bins of  $2^\circ\text{C}$ . For each bin,  $n = 5-12$ , except at  $T_a \sim 56^\circ\text{C}$ , where  $n = 3$ .

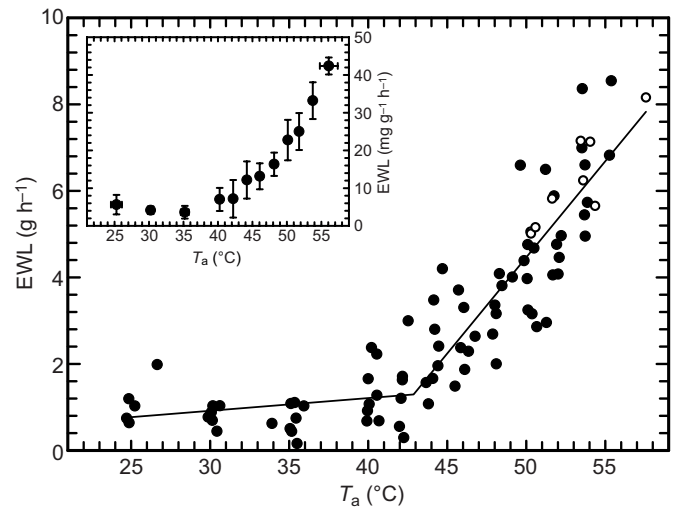

**Fig. 3.** Evaporative water loss (EWL) in Burchell's sandgrouse (*Pterocles burchelli*) increased rapidly above an inflection point at an air temperature ( $T_a$ ) of  $42.9^\circ\text{C}$ . Data for individuals that reached their thermal endpoint are shown as open circles. The solid line is the segmented linear regression model that provided the best fit; the relationship between EWL and  $T_a > 42.9^\circ\text{C}$  is  $\text{EWL} = 0.445T_a - 17.76$  ( $r^2$  for segmented regression model = 0.843). Inset shows mean  $\pm$  s.d. mass-specific EWL for  $T_a$  bins of  $2^\circ\text{C}$ . For each bin,  $n = 5-12$ , except at  $T_a \sim 56^\circ\text{C}$ , where  $n = 3$ .

We apologise to the authors and readers for any inconvenience this may have caused.
